# Supplementary material for: Post-Modified Polypeptides with UCST-Type Behavior for Control of Cell Attachment in Physiological Conditions
Source: MDPI journal article supplement (doi:10.3390/ma11010095), 2018-01-09
Supplement: s1 [file s1]

# Supplementary Materials: Post-Modified Polypeptides with UCST-Type Behavior for Control of Cell Attachment in Physiological Conditions

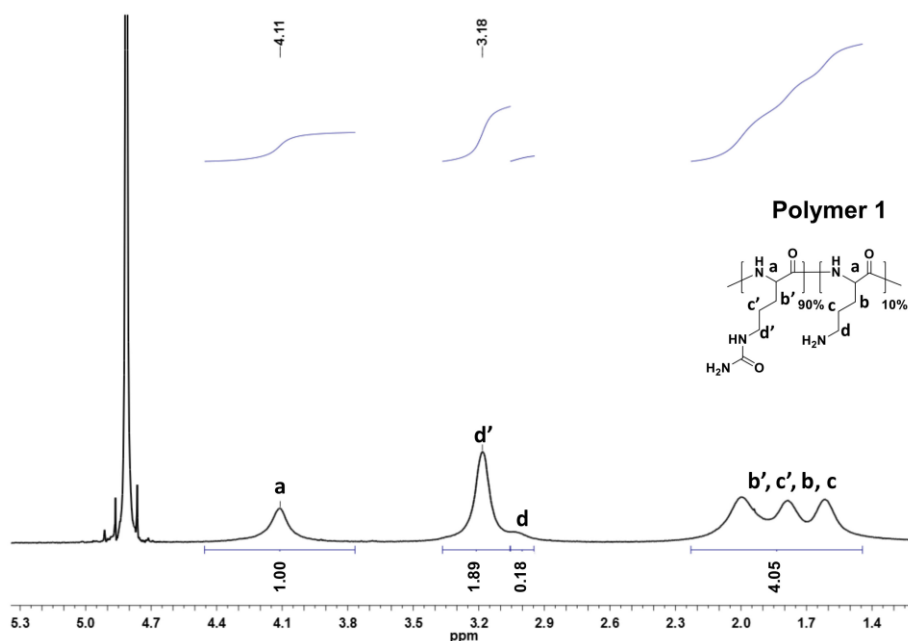

Figure S1.  $^1\text{H}$ -NMR (400 Hz,  $\text{D}_2\text{O}$ ) spectrum for Polymer 1 at 70 °C.

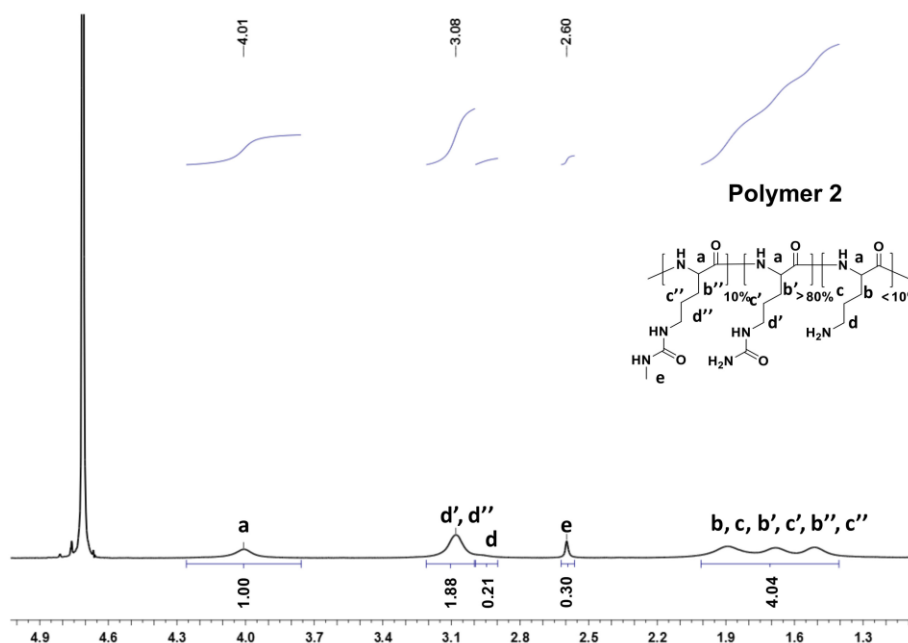

Figure S2.  $^1\text{H}$ -NMR (400 Hz,  $\text{D}_2\text{O}$ ) spectrum for Polymer 2 at 70 °C.

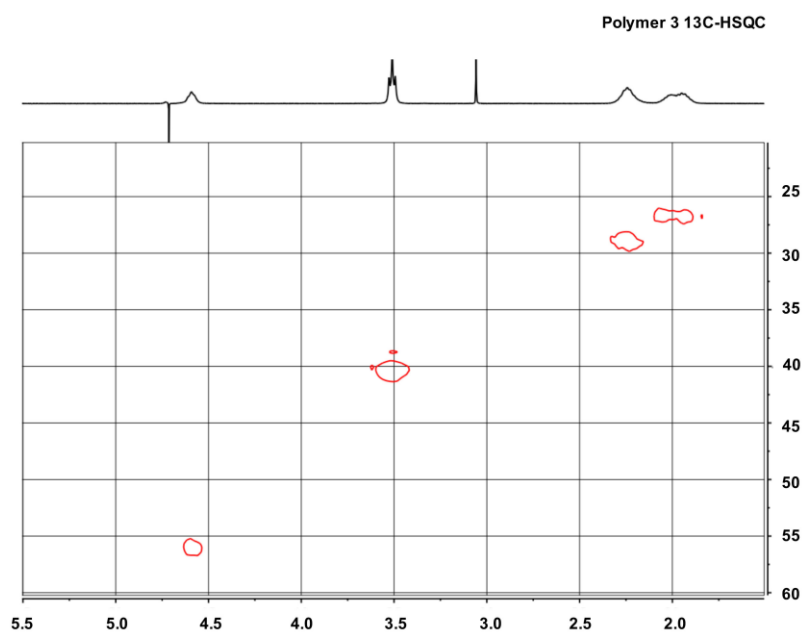

Figure S3. <sup>13</sup>C-HSQC (400 Hz, D<sub>2</sub>O) spectrum for Polymer 3 at 70 °C.

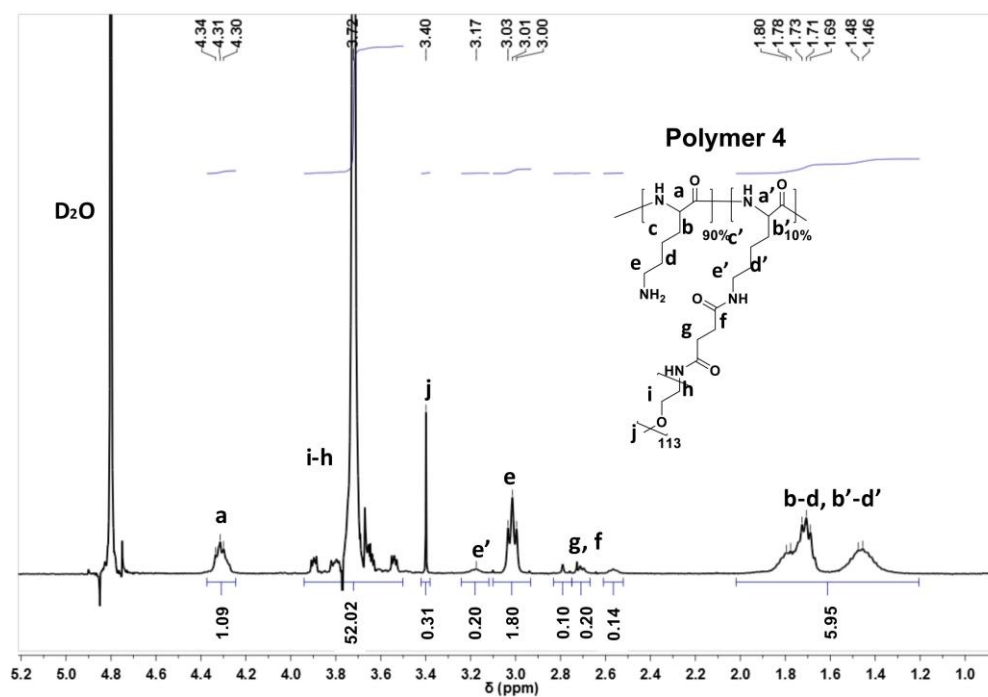

Figure S4. <sup>1</sup>H-NMR (400 Hz, D<sub>2</sub>O) spectrum for Polymer 4 at room temperature.

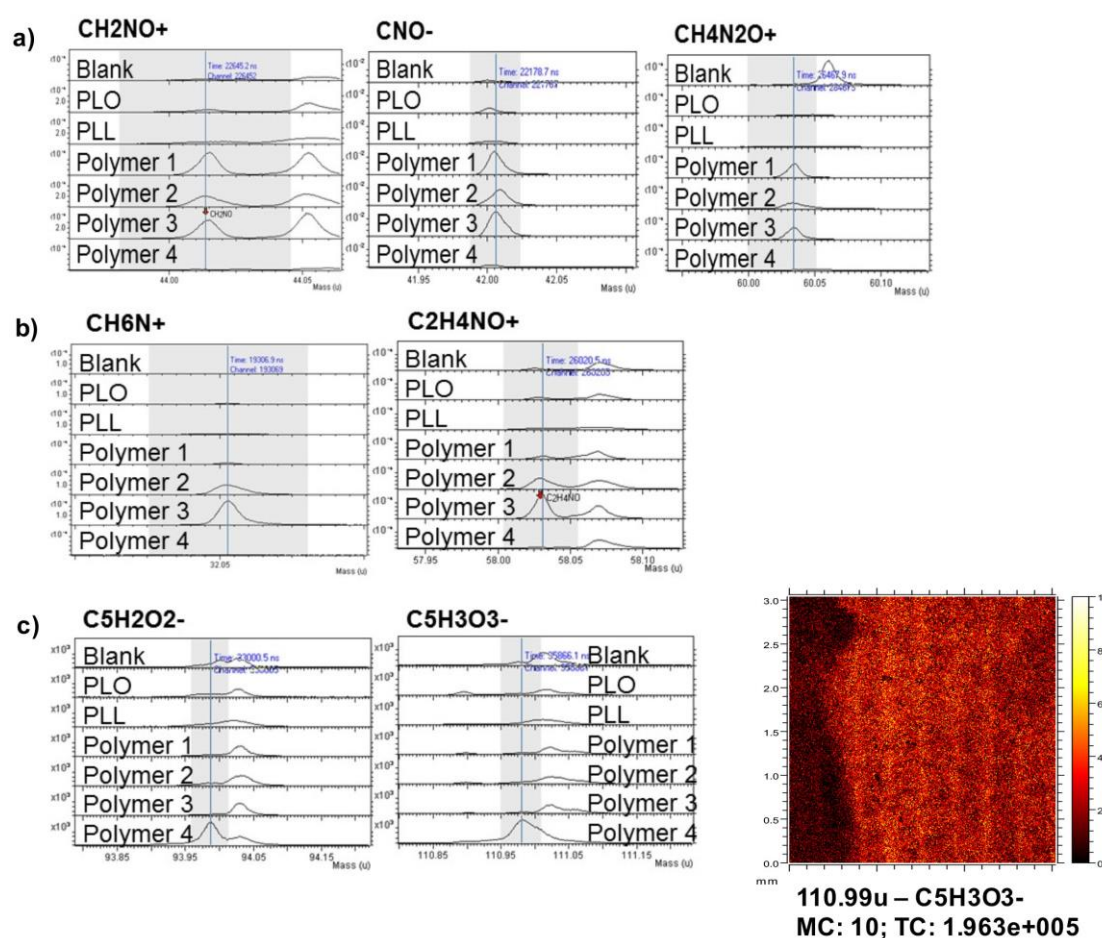

**Figure S5.** ToF SIMS spectra and image of signals from specific chemical structures for Polymer 1, 2, 3, 4, PLO, PLL-coated plastic surfaces, and Blank control. (a) Signals from ureido modification; (b) Signals from MIT modification; (c) Signals from PEG modification.

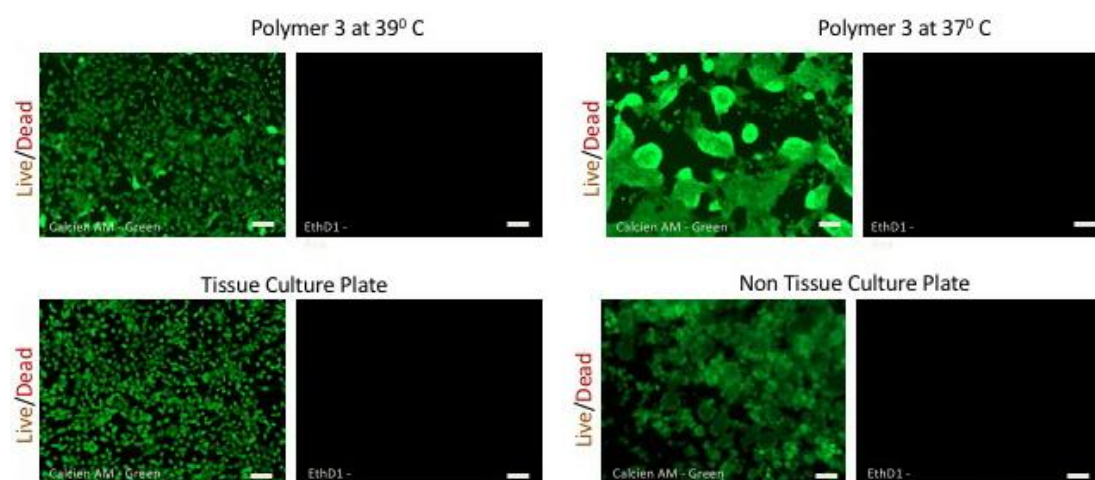

**Figure S6.** Live/Dead assays of cells attached on Polymer 3 coated surface, Tissue culture and non-Tissue culture plates at 39 °C after overnight incubation. The released cells from the Polymer 3 were imaged after 2 h incubation at 37 °C.

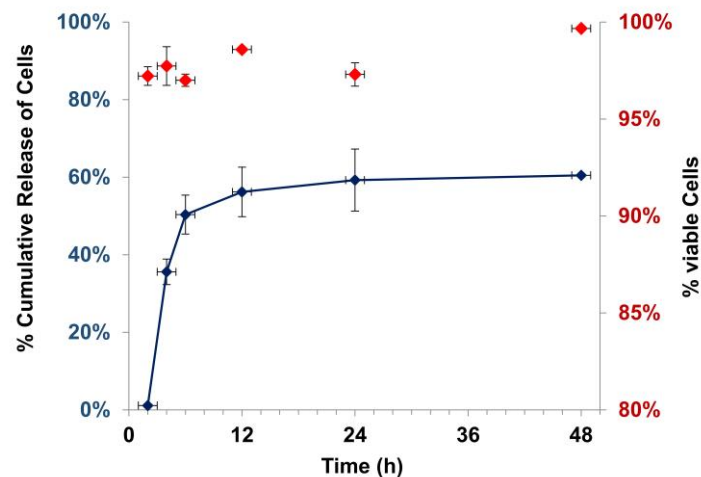

**Figure S7.** Percentage of cells, in relation to the total number of cells seeded, which were released over differential times (2, 4, 6, 12, 24 h) from the polymer-coated surface at the polymer phase-transition temperature of 37 °C, determined using manual counting with Trypan blue.

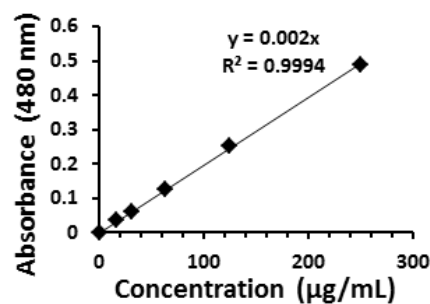

**Figure S8.** Standard curve for Pierce Quantitative Colorimetric Peptide Assay.

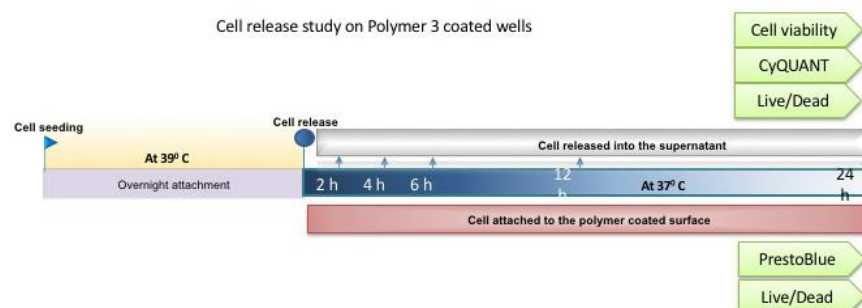

**Figure S9.** Schematic of the cell release study. After culturing the cells at 39 °C overnight on Polymer 3-coated surfaces, the cells were transferred to solutions at 37 °C. The released cells were analyzed using either Trypan blue + counting or with CyQUANT at each of the time points. The attached cells were analyzed using Presto blue at the respective time points. A Live/dead assay was performed to visualize cell release.
